# Supplementary material for: Remote Ischemic Preconditioning Does Not Affect the Release of Humoral Factors in Propofol-Anesthetized Cardiac Surgery Patients: A Secondary Analysis of the RIPHeart Study
Source: MDPI journal article supplement (doi:10.3390/ijms19041094), 2018-04-05
Supplement: s1 [file s1]

## **Supplemental digital content**

Figure S1 Experimental procedure

Figure S2 Flow chart of study participants

Figure S3 Troponin T levels after surgery

Table S1 Pre- and postoperative MIF concentration in serum samples

Table S2 Pre- and postoperative CXCL12 concentration in serum samples

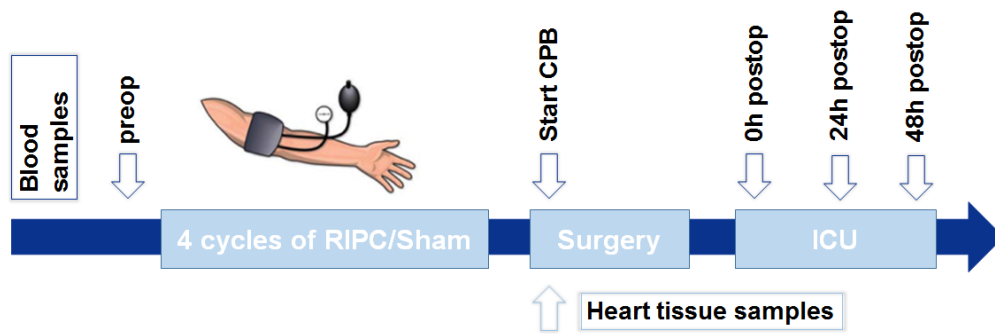

**Figure S1** Experimental procedure. Blood samples were drawn prior to surgery, after RIPC by 4 cycles of 5min arm ischemia/5 min reperfusion (n=19) and sham (n=21) procedure, after connection to cardiopulmonary bypass (CPB), at the end of surgery, 24h postoperatively and 48h after surgery.

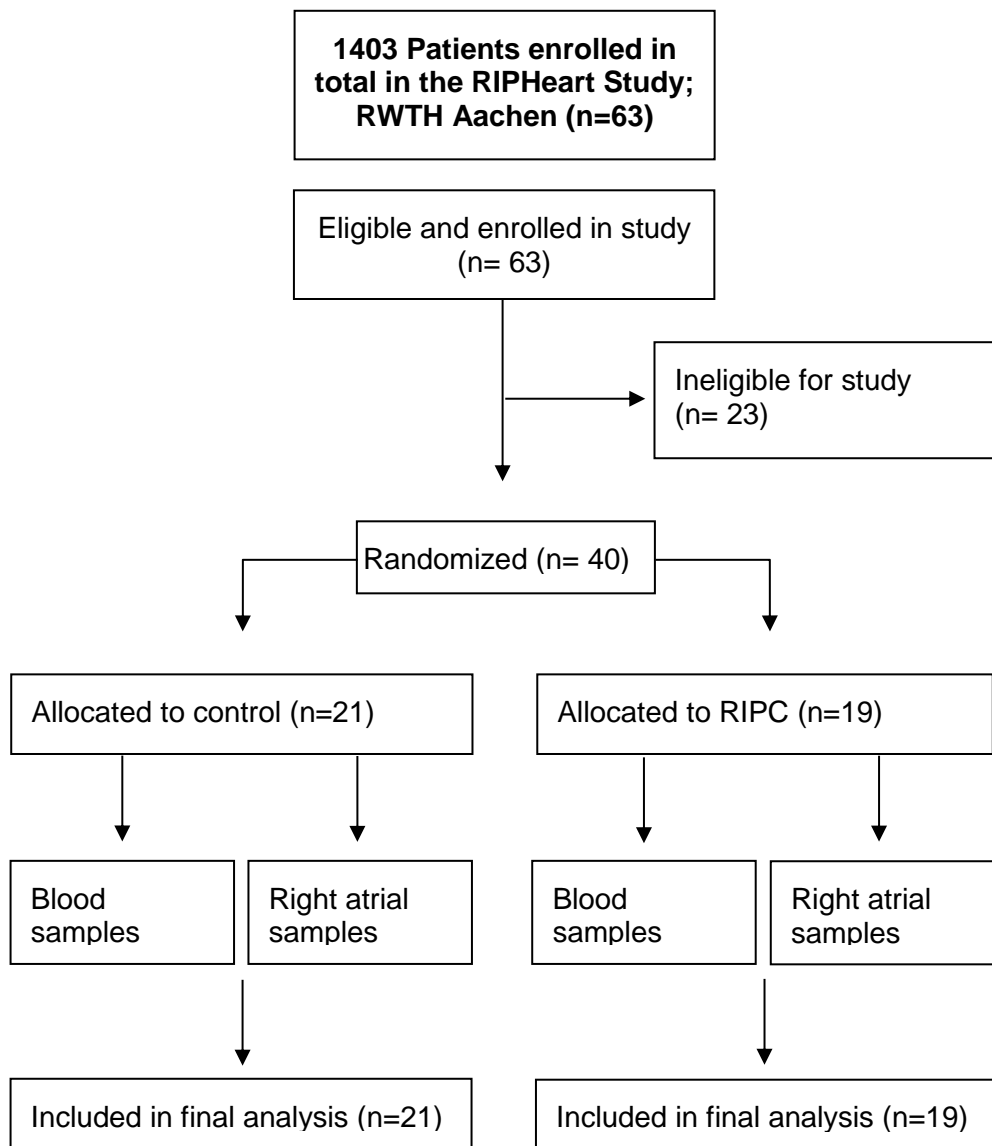

**Figure S2.** Flow chart of study participants.

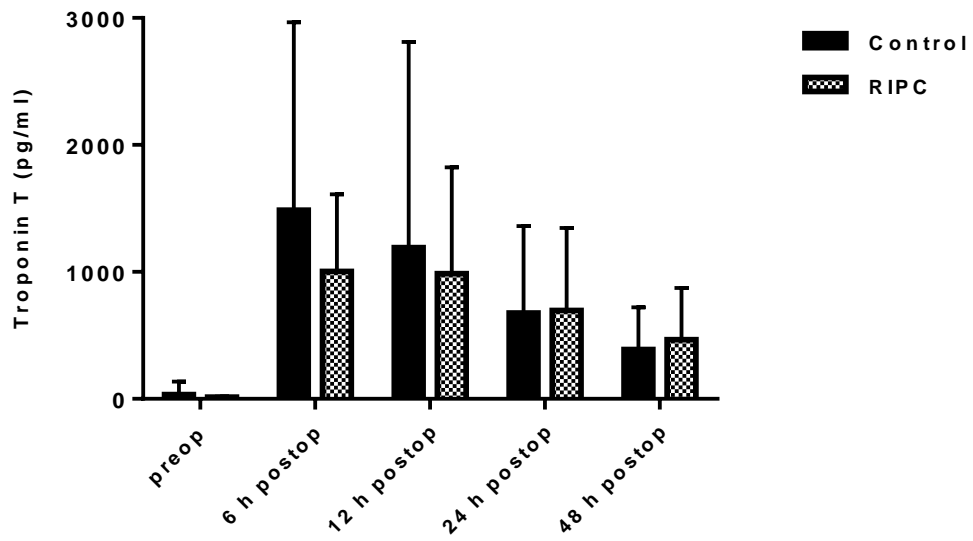

**Figure S3.** Troponin T levels after surgery. Troponin T levels were measured before surgery (Pre-OP) and 6h, 12h, 24h, 48h after cardiac surgery. Data represents means $\pm$ SD.

**Table S1 MIF data.**

|                            | Control group (n=21) |                              | RIPC group (n=19) |                              |                          |
|----------------------------|----------------------|------------------------------|-------------------|------------------------------|--------------------------|
| MIF (ng/ml)                | Mean ± SD            | p-value compared to baseline | Mean ± SD         | p-value compared to baseline | p-value comparing groups |
| A (before surgery)         | 53.4 ±53.31          | 1                            | 57.35 ±60.99      | 1                            | 0.828                    |
| X (after RIPC, before HLM) | 71.58 ±63.51         | 0.255                        | 61.62 ±69.15      | 0.802                        | 0.665                    |
| B (ICU admission)          | 90.59 ±69.26         | 0.023                        | 84.9 ±82.7        | 0.164                        | 0.814                    |
| D (24h after surgery)      | 52 ±63.98            | 0.921                        | 38.86±46.4        | 0.10                         | 0.466                    |
| E (48h after surgery)      | 55.54 ±38,46         | 0.812                        | 47.29 ±52.28      | 0.426                        | 0.587                    |

**Table S2 CXCL12 data.**

|                            | Control group (n=21) |                              | RIPC group (n=19) |                              |                          |
|----------------------------|----------------------|------------------------------|-------------------|------------------------------|--------------------------|
| CXCL12 (pg/ml)             | Mean ± SD            | p-value compared to baseline | Mean ± SD         | p-value compared to baseline | p-value comparing groups |
| A (before surgery)         | 276.46±243.45        | 1                            | 322.29±247.89     | 1                            | 0.597                    |
| X (after RIPC, before HLM) | 188.60±140.38        | 0.029                        | 198.88±113.51     | 0.001                        | 0.827                    |
| B (ICU admission)          | 912.05±789.81        | 0.002                        | 793.85±448.23     | 0.001                        | 0.607                    |
| D (24h after surgery)      | 271.94±226.32        | 0.934                        | 214.71±128.65     | 0.008                        | 0.405                    |
| E (48h after surgery)      | 351.08±329.60        | 0.364                        | 299.34±164.49     | 0.597                        | 0.587                    |
